## CORRIGENDUM

# The curation paradigm and application tool used for manual curation of the scientific literature at the Comparative Toxicogenomics Database

Allan Peter Davis, Thomas C. Wieggers, Michael C. Rosenstein, Cynthia G. Murphy and Carolyn J. Mattingly\*

doi:10.1093/database/bar034

Department of Bioinformatics, The Mount Desert Island Biological Laboratory, Salisbury Cove, ME 04672, USA

\*Corresponding author: Tel: +1 207 288 9880; Fax: +1 207 288 2130; Email: cmattin@mdibl.org

The authors regret the omission of a co-author from the original publication of the paper 'The curation paradigm and application tool used for manual curation of the scientific literature at the Comparative Toxicogenomics Database'.

The co-author, Michael C. Rosenstein, played an important role in developing the system discussed in the article.
